# Supplementary material for: Effects of prostaglandin F2α (PGF2α) on cell-death pathways in the bovine corpus luteum (CL)
Source: PubMed Central journal article supplement (PMC6873574; doi:10.1186/s12917-019-2167-3), 2019-11-21

A

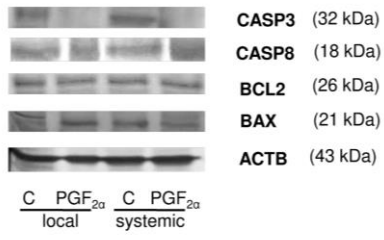

B

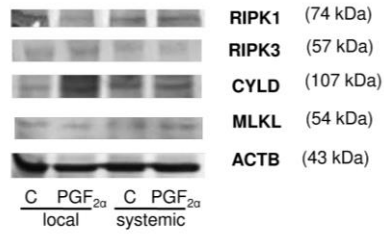

Supplement: 12917_2019_2167_MOESM1_ESM.pdf [file 12917_2019_2167_MOESM1_ESM.pdf]
